# Supplementary material for: Malnutrition exacerbates pathogenesis of Lutzomyia longipalpis sand fly-transmitted Leishmania donovani
Source: Springer Nature journal article supplement (doi:10.1038/s42003-025-08106-8), 2025-05-13
Supplement: MOESM1 [file 42003_2025_8106_MOESM1_ESM.pdf]

## Supplementary information

### **Malnutrition exacerbates pathogenesis of *Lutzomyia longipalpis* sand fly-transmitted *Leishmania donovani***

Eva Iniguez<sup>1\*</sup>, Johannes Doehl<sup>1#</sup>, Pedro Cecilio<sup>2#</sup>, Tiago Donatelli Serafim<sup>1</sup>, Caroline Percopo<sup>3</sup>, Yvonne Rangel-Gonzalez<sup>1</sup>, Somaditya Dey<sup>1,4</sup>, Elvia J. Osorio<sup>5</sup>, Patrick Huffcutt<sup>1</sup>, Sofia Roitman<sup>6</sup>, Claudio Meneses<sup>1</sup>, Mara Short<sup>1</sup>, Jesus G. Valenzuela<sup>1</sup>, Peter C. Melby<sup>5</sup>, Shaden Kamhawi<sup>1\*</sup>

#These authors contributed equally

\*These authors jointly supervised this work; [iniguezea@nih.gov](mailto:iniguezea@nih.gov), [skamhawi@nih.gov](mailto:skamhawi@nih.gov).

<sup>1</sup>Vector Molecular Biology Section, Laboratory of Malaria and Vector Research, National Institute of Allergy and Infectious Diseases, National Institutes of Health, Rockville, MD, USA

<sup>2</sup>Vector Biology Section, Laboratory of Malaria and Vector Research, National Institute of Allergy and Infectious Diseases, National Institutes of Health, Rockville, MD, USA

<sup>3</sup>Laboratory of Malaria and Vector Research, National Institute of Allergy and Infectious Diseases, National Institutes of Health, Rockville, MD, USA

<sup>4</sup>Post Graduate Department of Zoology, Barasat Government College, Barasat, West Bengal, India

<sup>5</sup>Department of Internal Medicine, University of Texas Health Science Center at San Antonio, San Antonio, TX, USA

<sup>6</sup>Integrated Data Sciences Section, Research Technologies Branch, National Institute of Allergy and Infectious Diseases, National Institutes of Health, Bethesda, MD, USA 20892

Supplemental figures

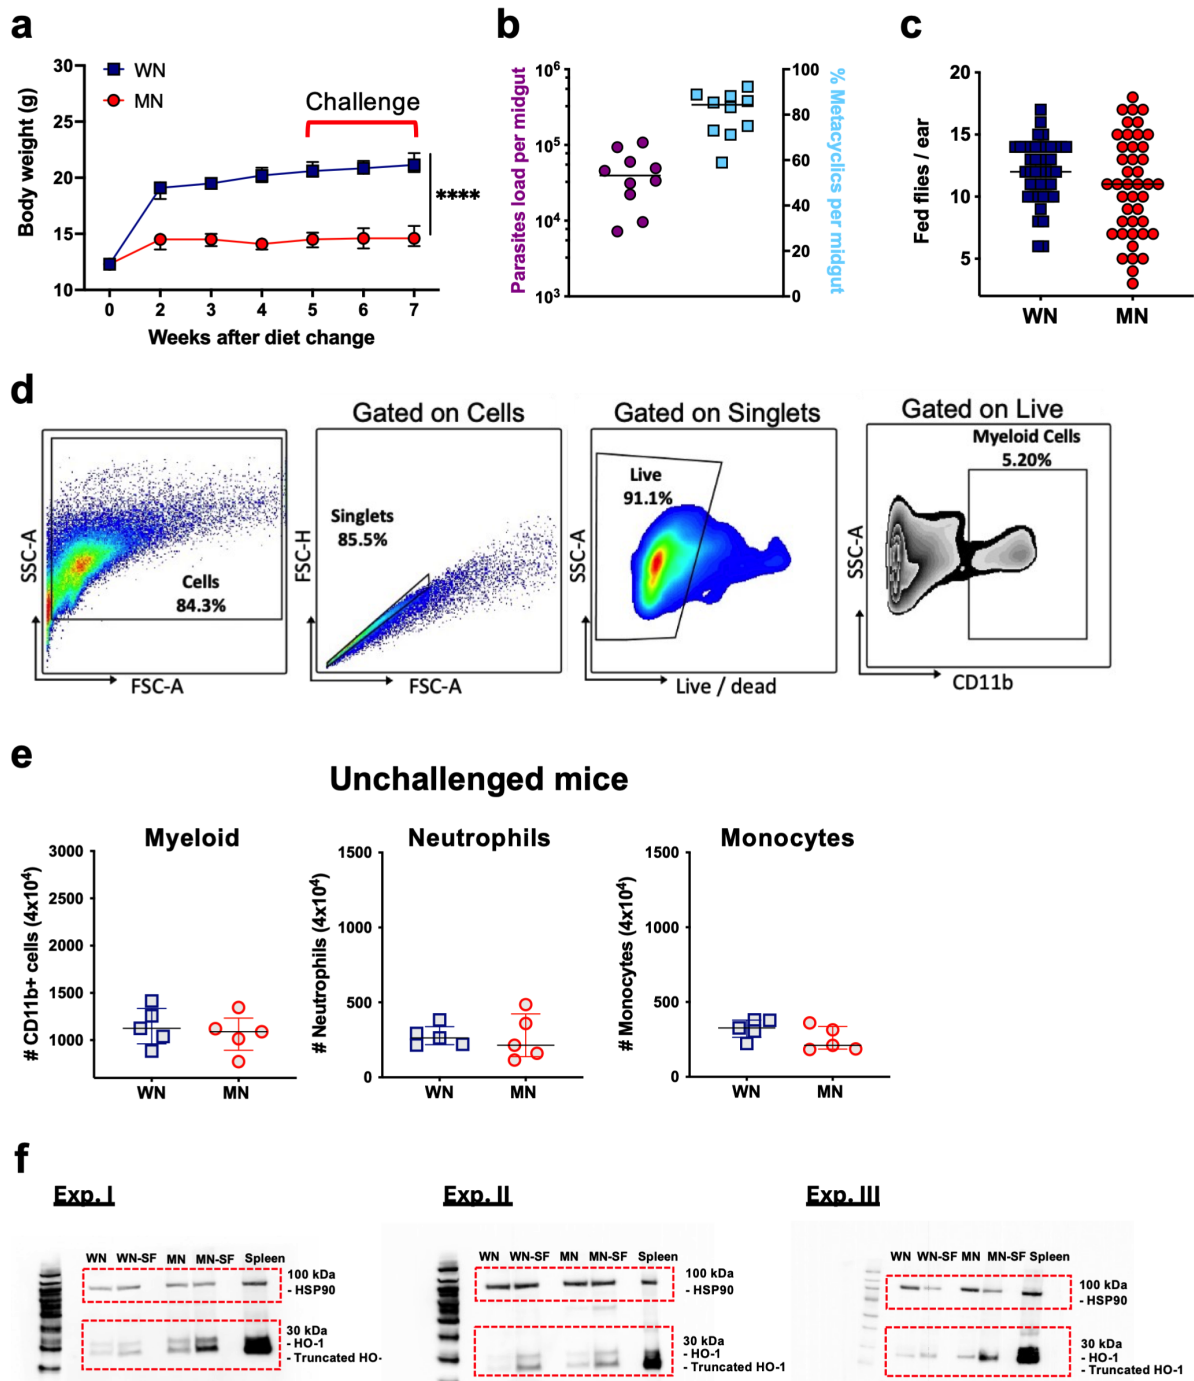

**Figure S1. Animal body weight, sand fly infection status and feeding behavior, flow cytometry gating strategy and counts of immune cells in steady state skin**

**a)** Animal body weight post-diet change. BALB/c female mice were assigned to a polynutrient (well-nourished, WN) or polynutrient-deficient (malnourished, MN) diet for up to 7 weeks before challenge. **b)** The status of a representative sand fly infection used in vector-transmission experiments. The number of *Leishmania donovani* parasites per midgut and percent of infectious metacyclic promastigotes was evaluated at day 9-11 post-sand fly infection by artificial membrane feeding. **c)** Feeding score post-transmission. WN and MN mice were exposed to 20 infected sand flies/per ear. **d)** Gating strategy to identify CD11b<sup>+</sup> cells, neutrophils (Ly6C<sup>+</sup>Ly6G<sup>+</sup>), and inflammatory monocytes (Ly6C<sup>+</sup>Ly6G<sup>-</sup>) in skin using flow cytometry. **e)** Number of CD11b<sup>+</sup> cells, neutrophils, and inflammatory monocytes in unchallenged WN and MN animals. WN, well-nourished; MN, Malnourished. Cumulative data of 2 experiments,  $n = 4-5$  animals per group **(a)**. Representative data of  $n = 5$  experiments,  $n = 10$  midguts **(b and c)**. Data are representative of 2 experiments,  $n=5$  animals per group, and each data point represents a pool of 2 ears per animal **(e)**. **f)** Uncropped Heme oxygenase 1 (HO-1) expression in skin tissue lysate 72 h post-infected bites by Western blot. HSP90, loading control. WN, well-nourished; MN, Malnourished; SF, sand fly; ND, needle. Western blots from 3 independent experiments,  $n = 5-10$  pooled ears per. Data shows the median with 95% CI **(a)**, median **(b and c)**, and median with IQR **(e)**. \*\*\*\* $P \leq 0.0001$  was considered significant. Significance was calculated by Robust one-way ANOVA **(a)**, negative binomial regression model **(c)**, and Linear Contrast Expression **(e)**. Refer to Supplementary Data 2 file for the full statistical analysis report. All experiments were blinded.

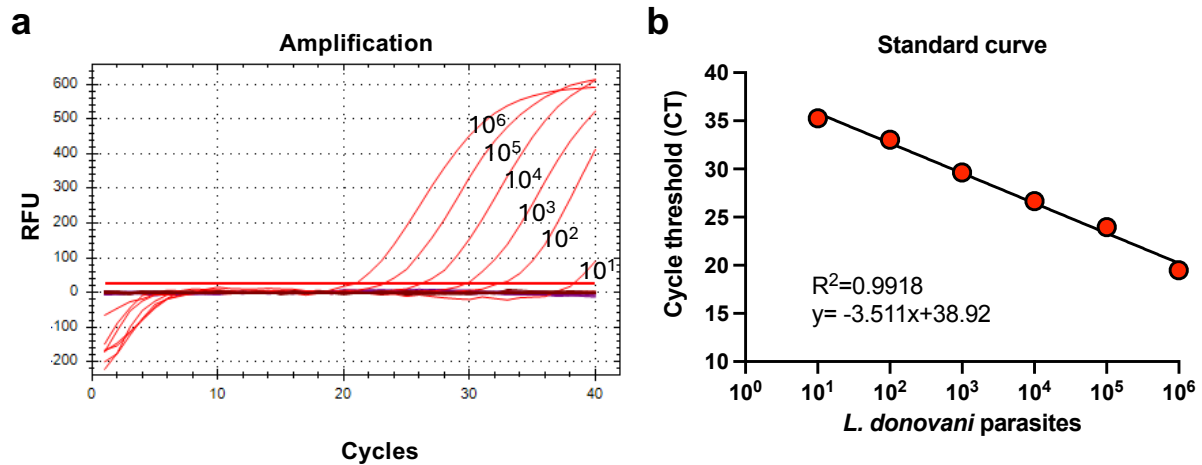

**Figure S2. *Leishmania donovani* amplification by qPCR and standard curve**

**a)** Amplification of *L. donovani* parasites from DNA co-extracted after spiking mouse tissues with known numbers of parasites. **b)** Data was used to generate a standard curve of the cycle threshold (CT) that corresponds to the number of spiked *L. donovani* parasites.

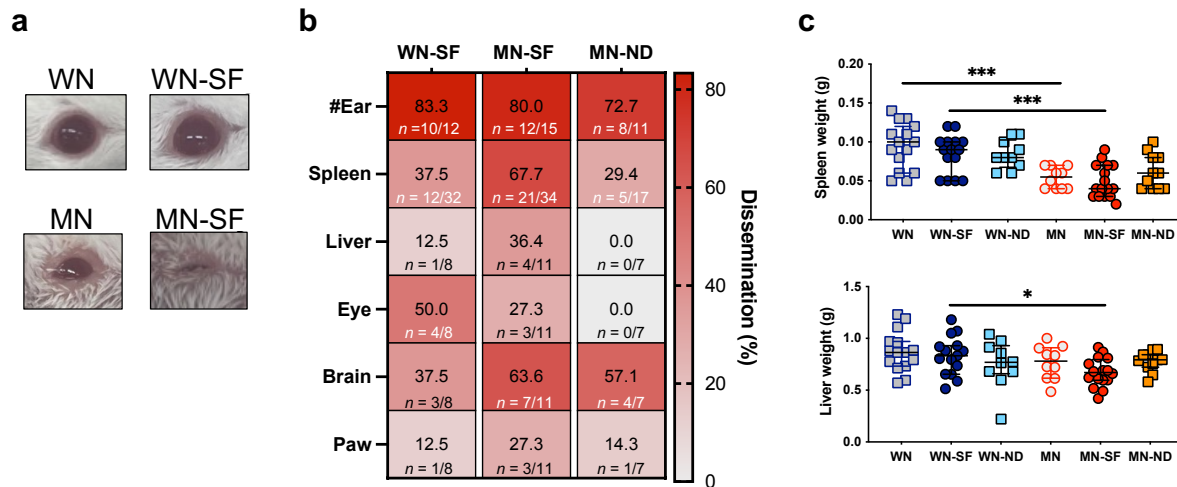

**Figure S3. Ocular symptoms and frequency of parasite dissemination in sand fly-infected malnourished animals in the chronic stage of VL**

**a)** Representative images showing the ocular symptoms exhibited in MN-SF animals compared to MN, WN, and WN-SF control groups. **b)** Frequency of parasite dissemination by tissue analyzed by qPCR. **c)** Spleen and liver weight before and after challenge. WN, well-nourished; MN, Malnourished; SF, sand fly; ND, needle. Cumulative data of 2-5 experiments, *n* = 4-5 animals per group (**b**). Cumulative data of 2-4 experiments, *n* = 4-5 animals per group (**c**). Data shows the median with IQR (**c**).  $P \leq 0.05$  was considered significant.  $*P \leq 0.05$ , and  $***P \leq 0.001$ . Significance was calculated by estimated marginal means analysis (**c**). Refer to Supplementary Data 2 file for the full statistical analysis report. All experiments were blinded.

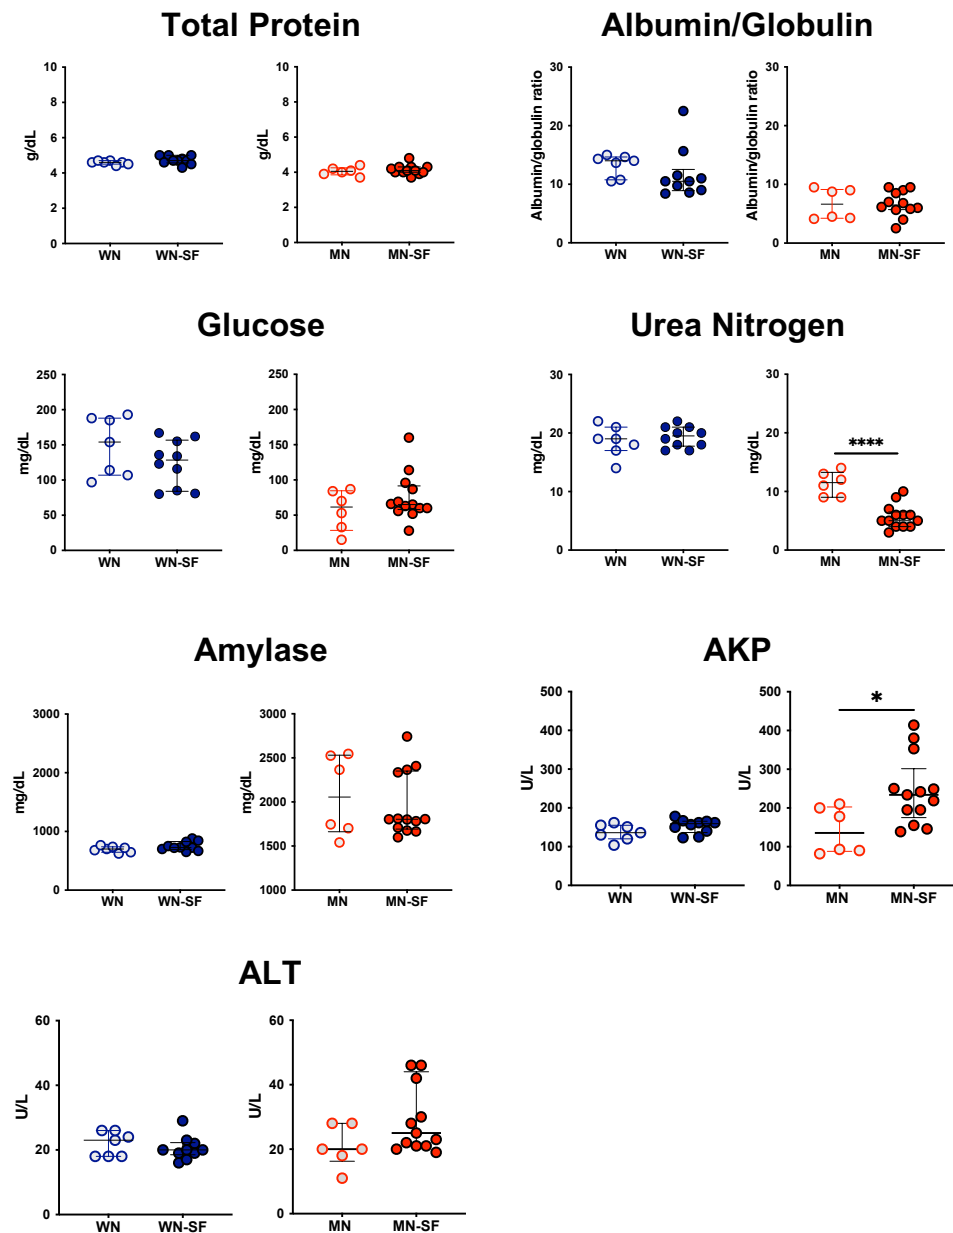

**Figure S4. Analysis of circulating levels of metabolic and inflammatory mediators in sand fly-infected malnourished animals in the chronic stage of VL**

WN and MN animals were followed up to 30 weeks post-*L. donovani* infected sand fly bites. Serum chemistry panel analytes. WN, well-nourished; MN, Malnourished; SF, sand fly. Cumulative data of 2 experiments,  $n \geq 3$  animals per group. Data shows the median with IQR;  $P \leq 0.05$  was considered significant.  $*P \leq 0.05$ ,  $****P \leq 0.0001$ . Significance was calculated by estimated marginal means for total

protein, albumin, globulin, glucose, and urea nitrogen, or linear contrast expression for ALT, ALP and amylase. Refer to Supplementary Data 2 file for the full statistical analysis report. All experiments were blinded.

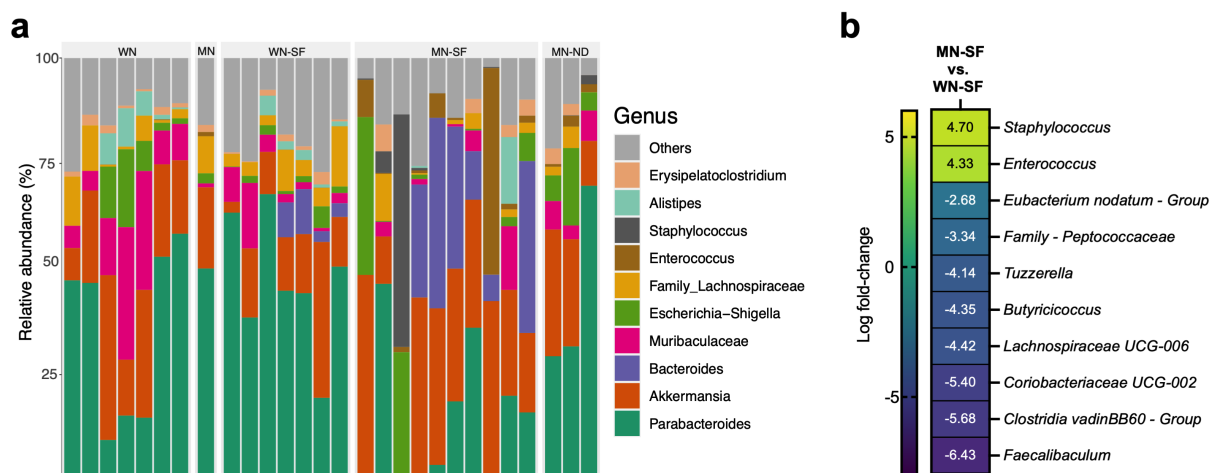

**Figure S5. Relative microbial abundance of top genera in sand fly-infected malnourished animals in the chronic stage of VL**

**a-b)** Microbes in fecal matter from animals at baseline for WN and MN, WN-SF and MN-SF, or MN-ND animals were compared. **a)** Relative abundance of the top ten genera per animal. **b)** Log fold change of microbial abundance in MN-SF versus WN-SF animals. Graph shows the top 9 statistically significant bacteria. WN, well-nourished; MN, Malnourished; SF, sand fly; ND, needle. Cumulative data of 2 experiments,  $n \geq 3$  samples per group, except for MN baseline where only one sample was analyzed. Differential abundance and significance were calculated using the ANCOM-BC method (FDR adjusted  $P$  value  $\leq 0.05$ ) **(b)**. All experiments were blinded.
